1                   **Just the Two of Us? A Family of *Pseudomonas***  
2                   **Megaplasmiids Offers a Rare Glimpse Into the Evolution of**  
3                   **Large Mobile Elements**

4

5

6 Brian A. Smith<sup>1\*</sup>, Courtney Leligdon<sup>1</sup>, and David A. Baltrus<sup>1,2</sup>

7

8

9 <sup>1</sup>School of Plant Sciences, University of Arizona, Tucson, AZ, USA

10 <sup>2</sup>School of Animal and Comparative Biomedical Sciences, University of Arizona,

11 Tucson, AZ, USA

12

13 \*corresponding author

14 basmith@email.arizona.edu

15

16

17

18 **Abstract**

19 Pseudomonads are ubiquitous group of environmental proteobacteria, well known  
20 for their roles in biogeochemical cycling, in the breakdown of xenobiotic materials,  
21 as plant growth promoters, and as pathogens of a variety of host organisms. We  
22 have previously identified a large megaplasmid present within one isolate the plant  
23 pathogen *Pseudomonas syringae*, and here we report that a second member of this  
24 megaplasmid family is found within an environmental Pseudomonad isolate most  
25 closely related to *P. putida*. Many of the shared genes are involved in critical cellular  
26 processes like replication, transcription, translation, and DNA repair. We argue that  
27 presence of these shared pathways sheds new light on discussions about the types  
28 of genes that undergo horizontal gene transfer (i.e. the complexity hypothesis) as  
29 well as the evolution of pangenomes. Furthermore, although both megaplasms  
30 display a high level of synteny, genes that are shared differ by over 30% on average  
31 at the amino acid level. This combination of conservation in gene order despite  
32 divergence in gene sequence suggests that this Pseudomonad megaplasmid family is  
33 relatively old, that gene order is under strong selection within this family, and that  
34 there are likely many more members of this megaplasmid family waiting to be found  
35 in nature.

36

## 37 **Introduction**

38 Horizontal Gene Transfer (HGT) of megaplastids can rapidly create dramatic  
39 phenotypic differences between otherwise closely related bacterial strains, with  
40 potential for over a thousand genes to be gained by a strain in a single event.  
41 Although there have been numerous attempts to identify overarching themes for the  
42 evolutionary effects of HGT based on types of genes and pathways transferred, such  
43 efforts have often neglected to incorporate intrinsic characteristics of megaplastids  
44 <sup>1-6</sup>. Furthermore, since secondary replicons are prone to rapid reshuffling of gene  
45 order as well as extensive gains and losses of loci, it has traditionally been  
46 challenging to analyze past evolutionary dynamics to understand overall historical  
47 pressures acting on this class of mobile elements<sup>7-14</sup>. More thorough investigation of  
48 evolutionary dynamics within relatively large plasmid families could therefore  
49 provide new viewpoints into the evolutionary effects of gene transfer and may also  
50 enable broader generalizations about selective forces driving the composition and  
51 overall structure of megaplastids, chromids, and second chromosomes.

52

53 Megaplastids are generally characterized as low copy extrachromosomal replicons  
54 >350kb in size and which are dispensable to the bacterial cell under a subset of  
55 conditions<sup>14</sup>. As with many plasmid families, they have often been identified because  
56 they impart beneficial phenotypes such as resistance to antimicrobial compounds or  
57 introduce novel catabolic pathways into host cells<sup>14</sup>. Given their size and gene  
58 content, it is possible that megaplastids possess greater potential for generating  
59 evolutionary costs than smaller plasmids when transferred to naive hosts<sup>15,16</sup>.

60 However, efforts to identify shared genes and pathways across megaplasmiids and to  
61 use this information to make predictions about potential systems level conflicts  
62 have been hampered by poor sampling across novel megaplasmiid families<sup>14</sup>.

63 Identification of additional examples can help to fill this gap in current knowledge  
64 and may uncover new evolutionary trends that govern megaplasmiid-chromosomal  
65 interactions.

66

67 Consideration of megaplasmiids may uniquely inform general discussions about  
68 evolutionary effects HGT in ways that have been overlooked by analyses focusing  
69 simply on distributions of genes and pathways maintained after transfers and  
70 without considering timing of HGT or linkage between loci. For instance, many of  
71 the earliest discussions concerning evolutionary constraints of HGT, the so called  
72 “complexity hypothesis”, found that loci associated with “more complex” cellular  
73 processes undergo lower rates of transfer than other genes<sup>4,17</sup>. Interpretations of  
74 these patterns have changed through time with examples of horizontally acquired  
75 informational genes, suggesting that it is actually the shape of protein interaction  
76 networks that are critical for maintenance after gene transfer.<sup>4,18-22</sup> However,  
77 larger mobile elements like megaplasmiids can contain genes encoding proteins and  
78 pathways that could be classified as “complex” (i.e. proteins involved in translation)  
79 and which have the potential to interact with numerous chromosomally encoded  
80 pathways<sup>14,23</sup>. Likewise, a variety of recent papers have focused on selective forces  
81 (or lack thereof) governing microbial pangenomes<sup>1-3,24</sup>. These discussions have  
82 largely focused on population level distributions for single genes that compose a

83 pangenome, but by their nature intrinsically fail to consider linkage of genes on  
84 plasmids that are frequently acquired and lost. While many genes within the  
85 pangenome may indeed be ‘adaptive’, such a viewpoint overlooks the idea that no  
86 single gene need be adaptive for the bacterial cell if selection acts at the level of  
87 plasmid transfer and hundreds of genes that could be linked to that process. More  
88 thorough characterization of multiple megaplasmid families and identification of  
89 new megaplasmids will enable identification of the types of genes and pathways  
90 canonically associated with these large vectors and patterns that emerge can be  
91 incorporated into greater discussions of the general role of HGT across bacterial  
92 species.

93

94 Previously we have described a megaplasmid, pMPPla0107, found within one isolate  
95 of the phytopathogen *Pseudomonas syringae*<sup>23</sup>. pMPPla107 is self-transmissible  
96 across the *Pseudomonas* phylogeny, harbors numerous loci that could be annotated  
97 as “housekeeping” genes, and it is stably maintained within recipient cells<sup>23,25,26</sup>. We  
98 have also demonstrated that acquisition of this megaplasmid through HGT also  
99 imparts significant phenotypic costs to recipient cells, likely mediated by  
100 detrimental interactions between chromosomal and plasmid encoded proteins<sup>26</sup>. It  
101 is unclear if pMPPla107 is the only megaplasmid of its kind and size with  
102 conjugation abilities across an entire genus of bacteria or if it is a member of a larger  
103 family of secondary replicons.

104

105 Here we identify a new megaplasmid, pBASL58, related to pMPPla107 and use  
106 molecular and computational approaches to characterize this megaplasmid family  
107 more broadly. We show that, while these megaplasmids are similar in size, genetic  
108 structure, nucleotide bias, and functionality, there is a high level of divergence  
109 across shared orthologous gene groups, a dissimilar cargo region, and differing  
110 CRISPR loci. This overall level of divergence suggests that both members of this  
111 megaplasmid family have been independently evolving for a relatively long period  
112 of time. Even more, we find that these divergent orthologous pathways demonstrate  
113 high levels of synteny in the context of overall plasmid structure; suggesting that  
114 conservation of gene orientation and order is under relatively strong selective  
115 pressures. Lastly, characterization of these plasmids allows for a chance to  
116 emphasize that pathways found on both megaplasmids are likely involved in  
117 important cellular processes like nucleotide synthesis and DNA replication, which  
118 highlights new discussion points to add to the complexity hypothesis as well as the  
119 adaptive nature of pangenomes.

120

## 121 **Methods**

122

### 123 *Identification of pBASL58*

124 Initial BLASTp searches coupled with inspection of contigs from a draft genome  
125 assembly of *Pseudomonas* sp. Leaf58<sup>27</sup> suggested that this strain could contain a  
126 megaplasmid related to pMPPla017, represented within contig  
127 Ga0102293\_111 within the draft genome assembly containing 18 contigs total

128 (Genbank accession GCA\_001422615.1). An isolate of *Pseudomonas* sp. Leaf58 was  
129 obtained from DSMZ (DSM-102683), and a single colony was picked from a culture  
130 from the freeze-dried ampule plated on unsupplemented LB media. To test for  
131 circularization of contig Ga0102293\_111, primers (BAS 17-31) were designed to  
132 amplify off of the edges of the contig and overlap each other. An approximate 1.5kb  
133 size PCR product was amplified from an overnight culture of this strain grown in KB  
134 media, demonstrating circularization of this contig. Sanger sequencing of this PCR  
135 fragment demonstrated that the initial draft contig contained a missassembly, and  
136 so this sequence was corrected by hand, and the contig as reoriented and used in all  
137 analyses in this manuscript. Sequence of this contig can be found at Figshare  
138 (doi:[10.6084/m9.figshare.6914033](https://doi.org/10.6084/m9.figshare.6914033)). For consistency of analyses throughout the  
139 manuscript we reannotated the megaplasmid sequence with Prokka v1.12 using  
140 default parameters, and this annotation can also be found at Figshare  
141 (doi:[10.6084/m9.figshare.6914033](https://doi.org/10.6084/m9.figshare.6914033)).

142

#### 143 *Genome Sequencing, assembly, and annotations of Pseudomonas sp. Leaf58*

144 As further evidence of the existence of a megaplasmid in Leaf58, we generated a  
145 complete genome assembly for this strain (currently found at Figshare  
146 (doi:[10.6084/m9.figshare.6914033](https://doi.org/10.6084/m9.figshare.6914033)), Genbank accession TBD). After revival from  
147 the Baltrus lab stock, a single colony *Pseudomonas* sp. Leaf58 was picked to an  
148 overnight culture in KB media, and grown in a shaking incubator at 27°C. After  
149 approximately 24 hours, DNA was extracted from this culture using a Promega  
150 Wizard kit. A rapid sequencing library was created using this DNA, and 169,316

151 reads (933,937,907 total bp, 5,515bp average read size) were generated on an R9.4  
152 flowcell using a Rapid sequencing kit (SQK-RAD004). Additionally, 100bp paired  
153 end Illumina reads used to generate the original draft genome of this strain were  
154 downloaded from the SRA (Accession ERR1103815)<sup>27</sup>. A complete genome  
155 sequence for *Pseudomonas* sp. Leaf58 was generated by combining these short and  
156 long reads in Unicycler (version 0.4.4)<sup>28</sup>. This sequence consists of a single  
157 chromosome (5,432,868 bp) and the pBASL58 megaplasmid (904,253bp), both of  
158 which were circular according to Unicycler.

159

#### 160 *Genome Sequencing, assembly, and annotations of Pla107*

161 A single colony of the Baltrus lab stock of *Pseudomonas syringae* pv. *lachrymans* 107  
162 (MAFF31015) was picked to an overnight culture in KB media, and grown in a  
163 shaking incubator at 27°C. After approximately 24 hours, DNA was extracted from  
164 this culture using a Promega Wizard kit. Illumina sequencing of was performed by  
165 MicrobesNG, and generated 2,771,213 250bp paired end reads (231 median read  
166 length after trimming, ~166x coverage of the genome) on an Illumina MiSeq.  
167 Assembly was performed using SPAdes v3.10.1 with default parameters as well as  
168 through MicrobeNG's bioinformatics pipeline, which matches the reads to the best  
169 reference using Kraken and maps reads back to that reference using BWA-MEM<sup>29</sup>.  
170 MicrobeNG also uses *de novo* assembly with SPAdes. pMPPla107 assembled  
171 completely from these reads, and this version of the megaplasmid sequence can be  
172 found Figshare (doi:[10.6084/m9.figshare.6914033](https://doi.org/10.6084/m9.figshare.6914033)) and was used for all analyses  
173 throughout this manuscript. Gene annotation of this version of the megaplasmid



174 sequence was performed with Prokka v1.12 using default parameters. This gene  
175 model used for all coding sequence analyses within the manuscript and can be  
176 found at Figshare (doi:[10.6084/m9.figshare.6914033](https://doi.org/10.6084/m9.figshare.6914033)). We additionally generated  
177 long read sequences for Pla107 using a MinION from Oxford Nanopore. A rapid  
178 sequencing library was created from an independent genomic isolation of a  
179 derivative of Pla107, DBL328, which contains an integrated version of the  
180 pMTN1907 marker plasmid and which has been selected to for kanamycin  
181 resistance from this marker plasmid. As above, a single colony of this strain was  
182 picked to an overnight culture in KB media and DNA was extracted with a Promega  
183 Wizard kit. 15,461 reads (139,041,576 total bp, 8,993 average read size) were  
184 generated on an R9.4 flowcell using a Rapid sequencing kit (SQK-RAD004). A whole  
185 genome assembly was created by combining both MiSeq and MinION reads using  
186 Unicycler (version 0.4.4)<sup>28</sup> with default parameters. This whole genome sequence  
187 consists of a circular chromosome (6,075,120 bp), pMPPla107 (971,889 bp, and  
188 sequence identical to the assembly from SPADES alone), and two other plasmids,  
189 pPla107-1 (62,136 bp) and pPla107-2 (40,720 bp). Three of these sequences  
190 (except pPla017-1) were complete and circular contigs according to Unicycler  
191 assembly. This assembly was used to update the Genbank version of this genome,  
192 and is found at accessions (CP031225, CP031226 CP031227, CP031228). Gene  
193 annotations in this Genbank file were generated by NCBI's PGAAP pipeline<sup>30</sup>.

194

195 *Identifying Origins of Replication*

196 To identify putative origins of replication for both megaplasmiids, we used a  
197 modified GC skew script<sup>31</sup> to scan the entirety of pMPPla107 and pBASL58 and  
198 combined this information with characterization of repetitive motifs that could  
199 represent *oriV* sites. GC skew and repetitive motifs suggest pMPPla107 and  
200 pBASL58 have predicted origins of replication within a similar genomic region near  
201 partitioning genes (Figure 2). Based on this information we oriented the sequences  
202 of pMPPla107 and pBASL58 to begin at the start codon of shared *parA*-like loci. We  
203 chose the *parA*-like locus as the starting point because it is shared by both  
204 sequences, is near the predicted origin of replication, and is predicted to be an  
205 important gene for plasmid partitioning.

206

### 207 *CRISPR Identification*

208 CRISPR-Cas and repeat structure annotations were identified using both Prokka  
209 annotations and the web tool CRISPRCasFinder<sup>32-34</sup>

210

### 211 *Plasmid Comparisons With BLASTp and MAUVE*

212 Amino acid sequence names were changed to numbers in an increasing order using  
213 the `mod_protein_id.py` script. We then used the BLAST 2.6.0+ package<sup>35</sup>. BLASTp  
214 parameters were altered to ensure only the top hit was returned and that there  
215 were zero overlapping hits. The BLAST command used was:

216

```
217 blastp -db [blastdb] -query [query_file] -culling_limit 1 -max_target_seqs 1 -
```

```
218 max_hsps 1 -out [out_file] -outfmt 6
```

219

220 Data was extracted from the BLAST output at 40, 50, 60, and 70% identity cutoffs  
221 and plotted in R using ggplot2.

222

223 pMPPla107 and pBASL58 sequences were input into Progressive Mauve 2.3.1 to  
224 compare megaplasmid sequences within the software Geneious <sup>36</sup>.

225

### 226 *Gene Mapping Visualization with Circa*

227 The BLASTp output data mentioned above was altered in a format to comply with  
228 input to Circa using gff\_info\_extract.py followed by geneid\_match.py. The  
229 parameters used to generate the Circa map and the Python scripts used to generate  
230 the data can be found at the [https://github.com/basmith89/megaplasmid\\_compare](https://github.com/basmith89/megaplasmid_compare).

231

### 232 *Tetranucleotide frequency Comparisons*

233 We performed pairwise comparisons of tetranucleotide frequencies between  
234 chromosome sequences and secondary replicon sequences in an all by all method.  
235 Tetranucleotide frequencies were calculated with the calc.kmerfreq.pl script created  
236 by Mads Albertsen<sup>37</sup> found at [https://github.com/MadsAlbertsen/multi-](https://github.com/MadsAlbertsen/multi-metagenome)  
237 [metagenome](https://github.com/MadsAlbertsen/multi-metagenome). Output of this script was plotted using ggplot2 and R<sup>2</sup> values were  
238 calculated in R.

239

### 240 *Functional Comparisons With KEGG, KASS, and UProC*

241 We carried out two analyses utilizing the Kyoto Encyclopedia of Genes and Genomes  
242 (KEGG) database<sup>38</sup>. Amino acid sequences of coding regions predicted by Prokka  
243 were input into the protein sequence classification software, UProC<sup>39</sup>. UProC's  
244 output is a list of KEGG IDs and counts. We designed a perl script,  
245 `kegg_path_counter.pl`, to extract these ID's and counts and associated them with  
246 KEGG functional pathways. The script and ID key can be found at  
247 [https://github.com/basmith89/megaplasmid\\_compare](https://github.com/basmith89/megaplasmid_compare). These data were then  
248 plotted with the Plotly package in R.

249

250 Amino acid sequences output by Prokka were also run through a Python script to  
251 produce a list of gene annotations that both megaplasמידs have in common  
252 [https://github.com/basmith89/megaplasmid\\_compare](https://github.com/basmith89/megaplasmid_compare). Amino acid sequences  
253 from genes on this shared list were then run through KASS (KEGG Automatic  
254 Annotation Server) to determine what pathways are shared by the megaplasמידs<sup>40</sup>.  
255 Pathways maps were then condensed into one figure by hand.

256

## 257 **Results**

### 258 *A new member of the pMPPla107 megaplasמיד family*

259 pMPPla107 was originally identified from an assembly using both 454 and 30bp  
260 Illumina sequencing reads<sup>23</sup>. However, due limitations of these early technologies,  
261 this assembly of pMPPla107 remained incomplete and consisted of linked scaffolds.  
262 We therefore utilized updated sequencing and assembly technologies to sequence  
263 the *P. syringae* genome containing pMPPla107, yielding a complete circular

264 sequence for this megaplasmid (971,889bp compared to 963,598bp in original  
265 sequence) (Table 1). Additionally, multiple searches using protein sequences from  
266 pMPPla107 consistently yielded high quality matches to the scaffold  
267 Ga0102293\_111 (referred to as pBASL58 from here on) from a public genome  
268 assembly of *Pseudomonas* sp. Leaf58. This strain was originally isolated as part of a  
269 project to thoroughly sample cultureable strains from the phyllosphere of  
270 Arabidopsis and is most closely related to *P. putida* strains<sup>41</sup>. We independently  
271 confirmed circularization (Figure 1) of this contig from Leaf 58, using both PCR and  
272 long read nanopore sequencing, definitively showing this contig was indeed a large  
273 megaplasmid separate from the chromosome.

274

275 *Both megaplasmsids contain numerous tRNA loci*

276 The size, number of predicted genes, number of tRNAs, and GC content are highly  
277 similar between pMPPla107 and the pBASL58 (Table 1). Overall GC content was  
278 similar in Leaf58 and *P. syringae lac107*, and the GC content in both pMPPla107 and  
279 pBASL58 were lower than their respective chromosomal partners. pBASL58 and  
280 pMPPla107 contained 54 and 44 regions annotated as tRNA loci, respectively.  
281 pBASL58 encodes 20 unique tRNAs and pMPPla107 encodes 10, some of which  
282 were repetitive like tRNA-Glu(ttc) in pBASL58 occurring six times. When observing  
283 tRNA amino acid products, pMPPla107 encodes for 16/20 possible amino acids and  
284 pBASL58 encodes for 19/20 possible amino acids possibly indicating pBASL58 is  
285 less dependent on host tRNAs. In addition to the 16 amino acids produced by  
286 pMPPla107, pBASL58 is predicted to code for the ability to charge tRNAs with

287 tryptophan, glutamate, and aspartate and both plasmids are missing any anticodons  
288 to produce histidine. These differences could suggest an amino acid preference for  
289 the maintenance or protein production of the plasmids.

290

### 291 *Identifying genomic similarities of pMPPla107 and the Leaf58 plasmid*

292 Both megaplasms within this new family are highly syntenic (Figure 3A, with  
293 Mauve alignment showing that 72.8% (707,677bp out of 971,871bp) of pMPPla107  
294 aligns well with 71.6% (646,763bp out of 903,765bp) of pBASL58 (Supplemental  
295 Figure 1. The regions of highest similarity occur near the origin of replication.

296 Despite overall high levels of synteny, there is a highly dissimilar region  
297 (approximately 300kb in size) occurring within the first half of the sequences and a  
298  $\approx$ 50kb inversion in the last half indicating these megaplasms have also undergone  
299 structural diversification.

300

301 Even though both megaplasms display high levels of synteny, preliminary  
302 comparisons of protein sequences suggested a relatively high level of divergence  
303 between orthologues shared by both megaplasms (Figures 3B and C). The highest  
304 levels of average amino acid similarity (48.6%) occur near the predicted origin of  
305 replication where genes for plasmid replication, partitioning, and conjugation are  
306 common. Areas near the terminus still demonstrate strong synteny but have higher  
307 divergence in amino acid identity ( $\approx$ 38.2% similarity). These data suggest  
308 pMPPla107 and pBASL58 are structurally related to each other and share a common  
309 plasmid ancestor, but have experienced independent evolutionary pressures for

310 long enough time for significant diversification to occur within shared protein  
311 sequences.  
312  
313 To further gauge relationships between both megaplasmiids and the chromosomes  
314 of their host strains, we compared tetranucleotide frequencies for each of these  
315 replicons<sup>42-44</sup>. Pairwise comparisons demonstrated that pMPPla107/pBASL58 ( $R^2$   
316 = 0.878) and the *P. syringae*/Leaf58 ( $R^2$  = 0.889) chromosomes are most similar in  
317 frequencies (Figure 4). All remaining pairwise comparisons reported  $R^2$  values less  
318 than 0.780. pMPPla107 shows the greatest differences in tetranucleotide  
319 frequencies when compared to both the *P. syringae* and the Leaf58 chromosomes  
320 with  $R^2$  values of 0.524 and 0.393 respectively. pBASL58 shares slightly more  
321 similar frequency preferences indicative of  $R^2$  values of 0.780 and 0.695, to *P.*  
322 *syringae* and Leaf58 chromosomes respectively. This data suggest that mutational  
323 biases affecting these secondary replicons are most similar to each other, which  
324 suggests that they have not been replicating within these host strains long enough  
325 to be subject to amelioration.

326

327 *Housekeeping gene functionality is shared by pBASL58 and pMPPla107*

328 Based on the structural similarities established, we hypothesized that pMPPla107  
329 and pBASL58 would share similar functional pathways. UProC called 9% (85) and  
330 10% (111) of the predicted coding regions for pBASL58 and pMPPla107,  
331 respectively, indicating the majority of predicted gene functionality is unknown.  
332 Annotation with Prokka returned similar results (13% of genes with annotated

333 functions). The pathways and functions most frequently annotated were replication  
334 and repair at 2.3% (22 genes) for pBASL58 and 2.4% (26) for pMPPla107, global  
335 and overview maps at 2.1% (20) for pBASL58 and 2.2% (24) times for pMPPla107,  
336 and nucleotide metabolism at 1.3% (12) for pBASL58 and 1.8% (19) for pMPPla107  
337 (Figure 5). KEGG KASS also predicated that the two megaplasmids share 57.6%  
338 (99/172) of annotated genes. Therefore pBASL58 and pMPPla107 carry 31 and 42  
339 unique genes respectively. Again, the overall distribution of gene products present  
340 on both megaplasmids tends towards DNA synthesis, DNA repair, and synthesis of  
341 deoxyribonucleotide-triphosphates (Supplemental Table 1 and Supplemental Figure  
342 3). These shared groups include DNA polymerase III subunits, helicases, primase,  
343 ligases, recombination proteins, and exonucleases indicating these megaplasmids  
344 encode for pathways associated with their maintenance. Other gene products on  
345 these megaplasmids are involved in metabolic pathways such as fatty acid  
346 biosynthesis, RNA degradation, Aminoacyl tRNA biosynthesis, and NOD-like  
347 receptor signaling pathways. Interestingly, both plasmids also encode for several  
348 membrane and multidrug efflux pump genes. Both shared efflux genes belong to the  
349 Resistance-Nodulation-Division (RND) family of transporters and are known for  
350 their multidrug resistance efflux capabilities indicating potential selective factors  
351 enabling maintenance in host cells.

352

### 353 *Differences of pMPPla107 and the Leaf58 plasmid*

354 pBASL58 is predicted to encode a complete CRISPR system from 229-241kb,  
355 including two *cas*, three *csy* genes, and a repeat region that includes 36 repeats and



356 spacers(Figure 6). This CRISPR is located in the region of dissimilarity between  
357 pMPPla107 and pBASL58 and is not found in pMPPla107. pBASL58 and pMPPla107  
358 do share a (presumably) incomplete CRISPR systems at 436kb and 576kb  
359 respectively (Figure 6). These regions include *cas3*, *csy3*, and *csy4* but lack *csy1*,  
360 *csy2*. pMPPla107 lacks a repeat region altogether associated with this locus while  
361 pBASL58 has a repeat region at 720kb encoding 9 repeats and spacers. To our  
362 knowledge these are the first complete CRISPR systems located on plasmids found  
363 within Proteobacteria.

364

365 There exists a region of dissimilarity across both megaplasms, occurring after  
366 approximately 170kb (Figure 3), which could be classified as a cargo region. In  
367 pMPPla107 this region consists of 468 predicted genes, of which 27 are annotated.  
368 18 of these 27 annotated genes can be found in pBASL58 and again encode for genes  
369 associated with DNA replication, repair, and metabolism. These genes also include  
370 membranous proteins like FtsH, which is known to degrade unnecessary or  
371 damaged membrane proteins <sup>45,46</sup>. We have also found that this region can largely  
372 be deleted from pMPPla107 during lab adaptation (unpublished) even though the  
373 rest of the plasmid is maintained. These data suggest that although this large region  
374 may be expendable in some strains, pBASL58 has maintained many of the annotated  
375 genes perhaps pointing to their importance in megaplasms stability or  
376 maintenance.

377

378 **Discussion**

379 We report a family of divergent, yet syntenic megaplasmids found in single isolates  
380 across distinct *Pseudomonas* species. High levels of synteny are matched by shared  
381 signals in both tetranucleotide bias and protein pathway functionality. However,  
382 these plasmids hosted by strains that are phylogenetically and geographically  
383 separated; *Pla107* (containing pMPPla107) was found within a *P. syringae* isolate as  
384 a causative agent of cucumber disease in Japan, while Leaf58 was found as an  
385 epiphyte of *Arabidopsis* in Switzerland in a strain most closely related to *P. putida*<sup>41</sup>.  
386 Furthermore, despite high levels of synteny and shared protein functionality,  
387 consistently high levels of divergence across shared proteins ( $\approx 30\%$ ) suggest both  
388 plasmids have been independently evolving for a relatively long period of time.  
389 From this data we infer that multiple additional members of a family of relatively  
390 large ( $\approx 1\text{Mb}$ ) “cryptic” megaplasmids likely persist within *Pseudomonas* strains.  
391  
392 That there have been no signs of these megaplasmids in the numerous sequences of  
393 pseudomonads closely related to each of these isolates is strong indication that  
394 these megaplasmids have been relatively recently acquired by their host strains.  
395 This pattern, coupled with high levels of divergence between members of this  
396 megaplasmid family, suggest that these replicons likely have a high turnover rate  
397 within strains over evolutionary time and may persist within communities through  
398 frequent horizontal transfer. In other words, presence of this megaplasmid family  
399 may be transient in any given genome, but has likely been maintained within  
400 Pseudomonads for a long time. Such a lifestyle is consistent with high levels of  
401 conjugation as observed in pMPPla107 under laboratory conditions<sup>25</sup>.

402

403 Replication, transcription, and translation of horizontally transferred genes are  
404 known to incur costs on host cell resources with protein production likely having  
405 the greatest effect on fitness<sup>15,47-49</sup>. Previous work on pMPPla107 suggests that  
406 acquisition of the megaplasmid results in lowered fitness and other phenotypic  
407 changes which could be costly in some environments, yet it still transfers readily  
408 and is maintained within host cells<sup>25,26</sup>. Such costs could likely be the reason  
409 pMPPla107 and pBASL58 encode a large number of genes involved in critical  
410 functions regarding plasmid maintenance and transmission as well as potential  
411 addiction systems and could enable long-term survival despite a transient lifestyle.  
412 In particular, there are various proteins found in pMPPla107 and pBASL58 involved  
413 in synthesizing precursors for nucleotides such as: thymidylate synthase, guanylate  
414 kinase, ribonucleoside diphosphate reductase, deoxycytidine triphosphate  
415 deaminase, and glutamate synthase (Supplemental Table 1 and Supplemental Figure  
416 3). The megaplasmids may carry these proteins in order to increase flux to  
417 nucleotide synthesis and drive replication and transcription processes to alleviate  
418 any physiological costs an additional  $\approx 1$ Mb of newly acquired DNA may bring. Many  
419 of these genes do not encode for complete pathways, indicating possible parasitic  
420 behavior of host resources while ensuring the necessary building blocks for plasmid  
421 maintenance are available.

422

423 Plasmid usage of host tRNA pools has been shown to deplete tRNAs resulting in  
424 reduced growth and fitness<sup>20,50-52</sup>. The large number of tRNAs and presence of a

425 handful of annotated tRNA ligases encoded on the megaplasמידs may serve the  
426 purpose of avoiding translational costs due to tRNA depletion or may accommodate  
427 codon usage bias between chromosome and megaplasמיד. Both megaplasמידs are  
428 also predicted to encode Mfd, Rep, DnaB, and RecA all known to resolve replication  
429 and transcription complex conflicts ensuring successful replicon duplication and  
430 transcription<sup>53,54</sup>. We hypothesize the megaplasמידs maximize their ability to  
431 persist by eliminating or compensating for these potential costs by encoding a  
432 variety of housekeeping genes coupled with high levels of horizontal transfer  
433 through conjugation.

434

435 Evolutionary relationships between pBASL58 and pMPPla107, their relatively large  
436 size and contribution to gene content of single strains, coupled with maintenance of  
437 “housekeeping” genes, and high levels of transfer across pseudomonads suggest that  
438 this megaplasמיד will provide unique insights into an evolutionary argument  
439 concerning horizontal transfer referred to as the complexity hypothesis<sup>17</sup>. The  
440 complexity hypothesis has been through multiple revisions, but is currently  
441 interpreted as a trend where horizontally transferred genes are less likely to be  
442 involved with complex processes (like translation) and maintain a lower number of  
443 protein-protein interactions than vertically inherited loci<sup>4</sup>. One current limitation of  
444 the complexity hypothesis, as highlighted by these megaplasמיד families, is that it  
445 fails to reconcile gene conservation in the context of highly mobile selfish DNA like  
446 plasmids. Both pBASL58 and pMPPla107 contain numerous “complex” genes,  
447 including those involved in nucleotide synthesis, DNA replication, and translation

448 and yet these genes are clearly horizontally transferred across strains. Therefore,  
449 the presented family of megaplastids potentially necessitates a caveat to the  
450 complexity hypothesis in which “complex” genes can be horizontally transferred  
451 frequently but aren’t maintained over time, because they are linked together on  
452 megaplastids that require these pathways to ameliorate physiological costs.  
453  
454 Likewise, there have been numerous recent discussions about whether bacterial  
455 pangenomes are adaptive or neutral. Similar to the complexity hypothesis, these  
456 discussions tend to focus on the presence/absence of single genes across a variety of  
457 closely related genomes rather than the linked gain/loss of genes that compose a  
458 pangenome<sup>1-3</sup>. To put this in perspective, recent findings suggest that the *P.*  
459 *syringae* pangenome is composed of 77,728 genes, meaning that 1.5% of these are  
460 solely present on pMPPI107<sup>55</sup>. Since megaplastids have the potential to add  
461 thousands of genes to a pangenome linked together in a single transfer event<sup>56</sup>, one  
462 has to consider that evolutionary pressures may act differentially on subsets of the  
463 pangenome. Our data suggest that a majority of genes on these megaplastids may  
464 be either neutral or costly to the host when selection is considered in the context of  
465 the host genome. However, a majority of genes linked on the megaplastid may be  
466 selectively beneficial for megaplastid maintenance and/or transfer regardless of  
467 fitness of the host cell. Thus, presence of a majority of genes on the megaplastid  
468 (and which are part of the pangenome) are under selection at some level, but only a  
469 minority of these may be beneficial at the level of bacterial strains or populations.  
470

471 CRISPR-Cas systems have become popularized recently because of their utility in  
472 genome editing, however, these systems likely originated in bacteria as defense  
473 mechanisms against invasion of foreign genetic material<sup>57-61</sup>. CRISPR arrays are  
474 often carried and transferred by larger plasmids in bacteria and archaea, yet *cas*  
475 genes are rarely found on plasmids<sup>62,63</sup>. Here we characterize a potentially shared  
476 CRISPR-Cas system bound to the bacterial megaplasmids pMPPla107 and pBASL58.  
477 Although pBASL58 encodes a fully intact CRISPR-Cas3 system with a region  
478 containing 36 spacers and repeats, this repeat and spacer region are not present  
479 within pMPPla107 leading us to believe pMPPla107's system is nonfunctional.  
480 Regardless of functionality, it is quite interesting that at least one of these  
481 megaplasmids contains an intact CRISPR locus given the widespread idea that these  
482 systems are used by bacteria to defend against parasites and mobile elements.  
483 Perhaps the presence of a CRISPR system is a beneficial and selective trait for  
484 retention of pBASL58 in host cells in that it provides a transferable immune  
485 pathway. However, the recent description of CRISPR spacers that target sites on  
486 bacterial chromosomes also suggest that these loci may also function in gene  
487 regulation<sup>64-67</sup>.

488

489 Using comparative computational and molecular approaches we have characterized  
490 pBASL58, the second member of a family of large megaplasmids found in  
491 Pseudomonads. Conservation of pathway presence and megaplasmid structure  
492 strongly suggests that a majority of the sequences on pBASL58 and pMPPla107 have  
493 diverged from a common ancestral plasmid. However, the consistent levels of

494 divergence between proteins shared by both plasmids suggest that this common  
495 ancestral plasmid did not recently exist. Finding two related plasmids with such  
496 high level of divergence also highlights the likelihood that other members of this  
497 megaplasmid family exist in nature and are waiting to be found. Our work serves as  
498 a guide to discover megaplasmid families as well as a foundation of understanding  
499 the forces that structure megaplasmid evolution, maintenance, and transfer.

500

501

502

503

504

505

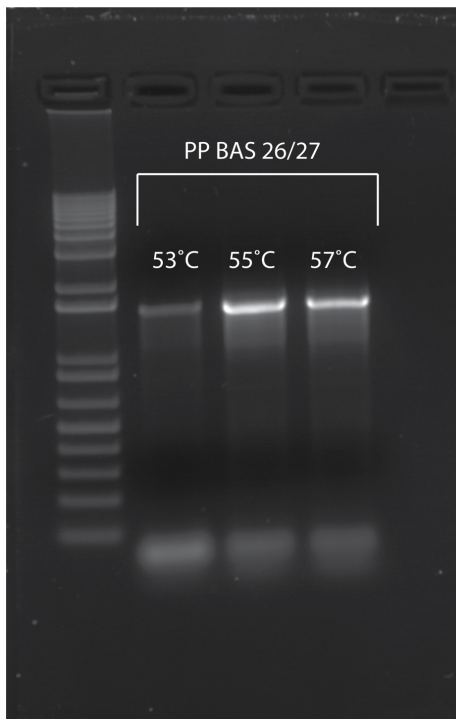

506

507 **Figure 1: Confirmation of circular DNA molecule of Leaf58 megaplasmid.**

508 Primers designed to amplify the ends of the Leaf58 contig and disregarding the

509 misassembled repeat region successfully amplified products of an expected size.

510 Three annealing temperatures (53, 55, and 57°C) were used due to difficulties

511 amplifying this region.

512



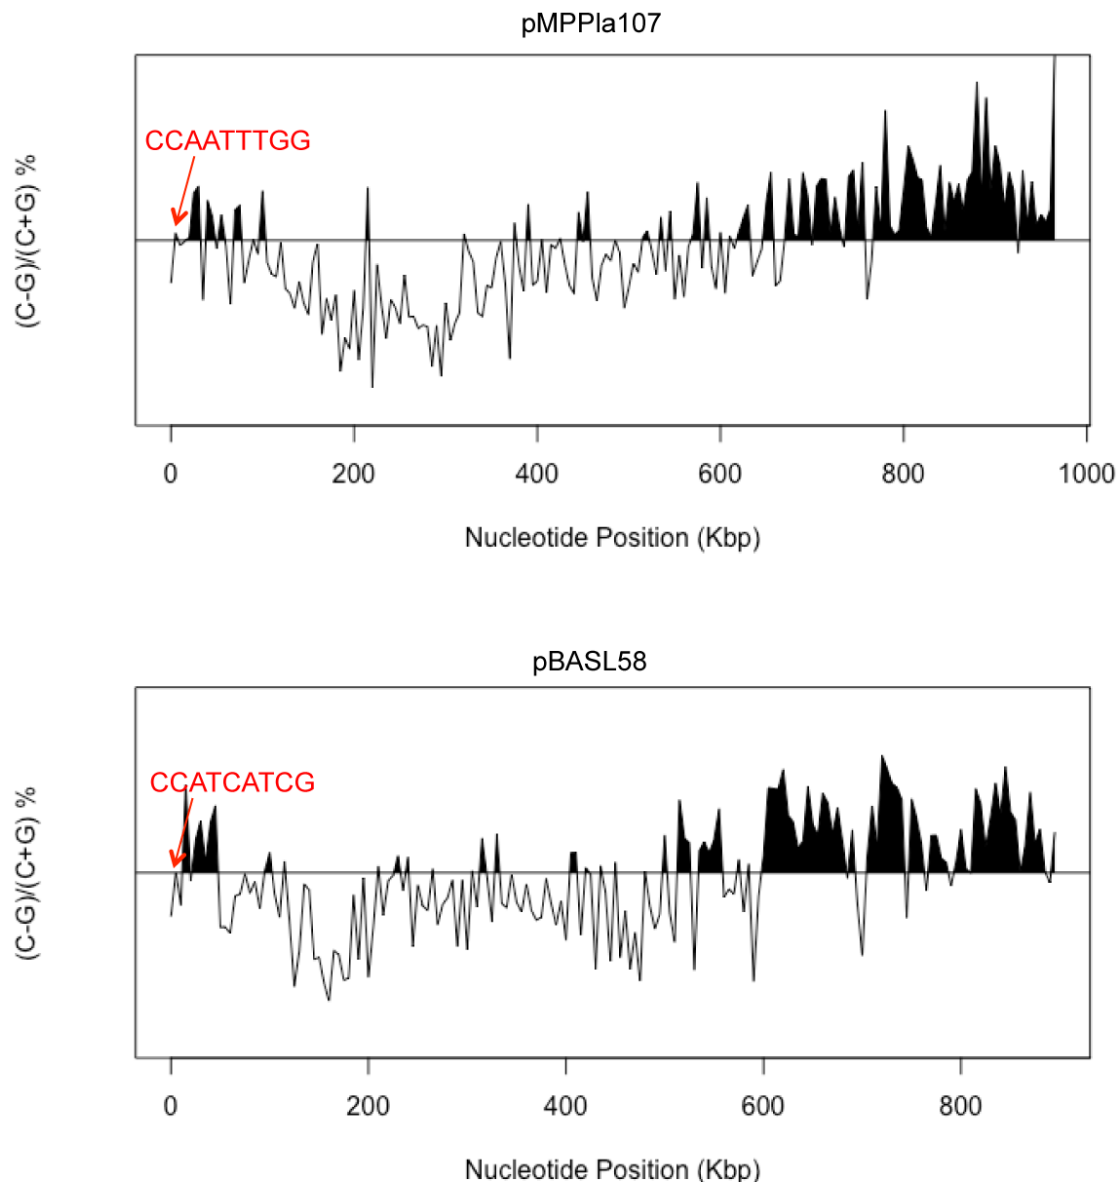

513

514 **Figure 2: Predicted origins of replication occur within a similar region of**  
515 **pMPPla107 and pBASL58.** GC skew was calculated and is a known predictor of  
516 origins of replication by a dramatic shift in GC content. Repetitive motifs were also  
517 calculated for areas near the predicted origin of replication as repetitive binding  
518 regions occur near replication sites. The most common motif is indicated in red.

519 **A)**

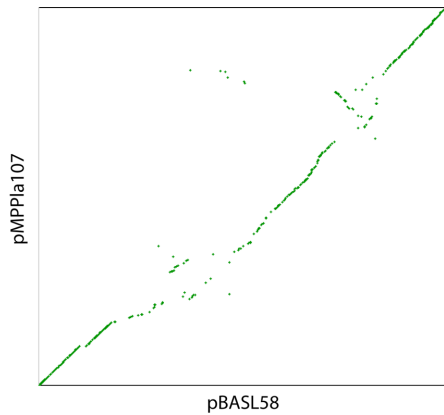

520

521 **B)**

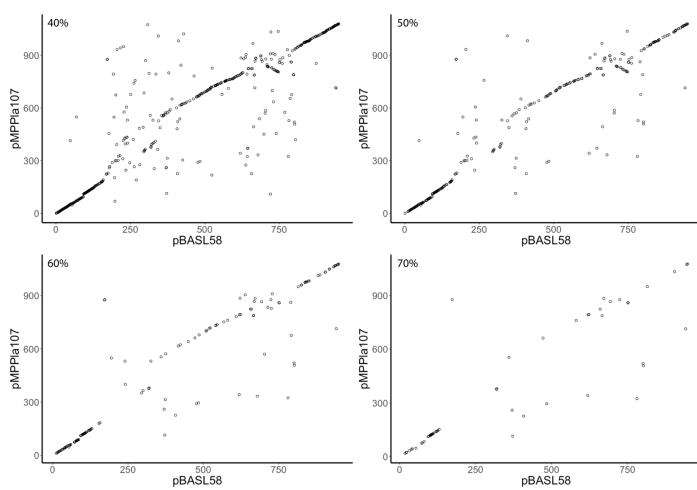

522

523 **C)**

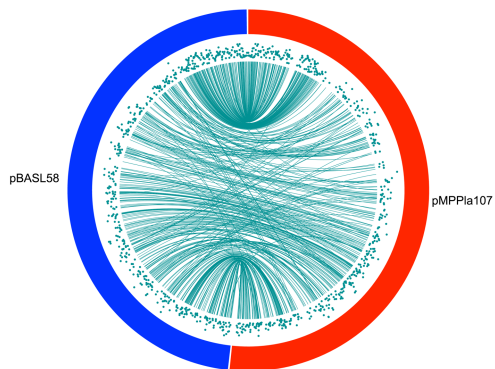

524

525 **Figure 3: pMPPla107 and pBASL58 share synteny and demonstrate divergence**

526 **on the amino acid level. A)** SynMap output of pMPPla107 vs. pBASL58 sequences

527 suggests highly syntenic megaplasmids. *X*-axis is pBASL58 gene order where  $x_{1...N} =$

528  $gene_{1...N}$ , and the *y*-axis is pMPPla107 gene order where  $y_{1...N} = gene_{1...N}$ . Completely

529 syntenic sequences would be represented by  $y = 1x + b$ . **B-C)** BLAST data was used to

530 plot pMPPla107 vs. pBASL58 synteny and amino acid divergence data together. **B)**

531 The majority of syntenic genes have  $\geq 50\%$  sequence identity. BLAST data was

532 plotted in gene order to mimic SynMap's plot with amino acid sequence identity

533 cutoffs at 40%, 50%, 60%, and 70%. The best hit for each pBASL58 gene against

534 pMPPla107 is plotted. Each axis indicates gene position within the corresponding

535 sequence. **C)** Circa plot using BLAST data indicates higher synteny near the origin,

536 while areas near the terminus are less syntenic and experience more noise. Teal lines

537 connect gene start position on pBASL58 to gene start position on pMPPla107. Teal

538 scatter plots are amino acid sequence identity with 40% = 0 (bottom) and 100% =

539 100 (top)

540

541

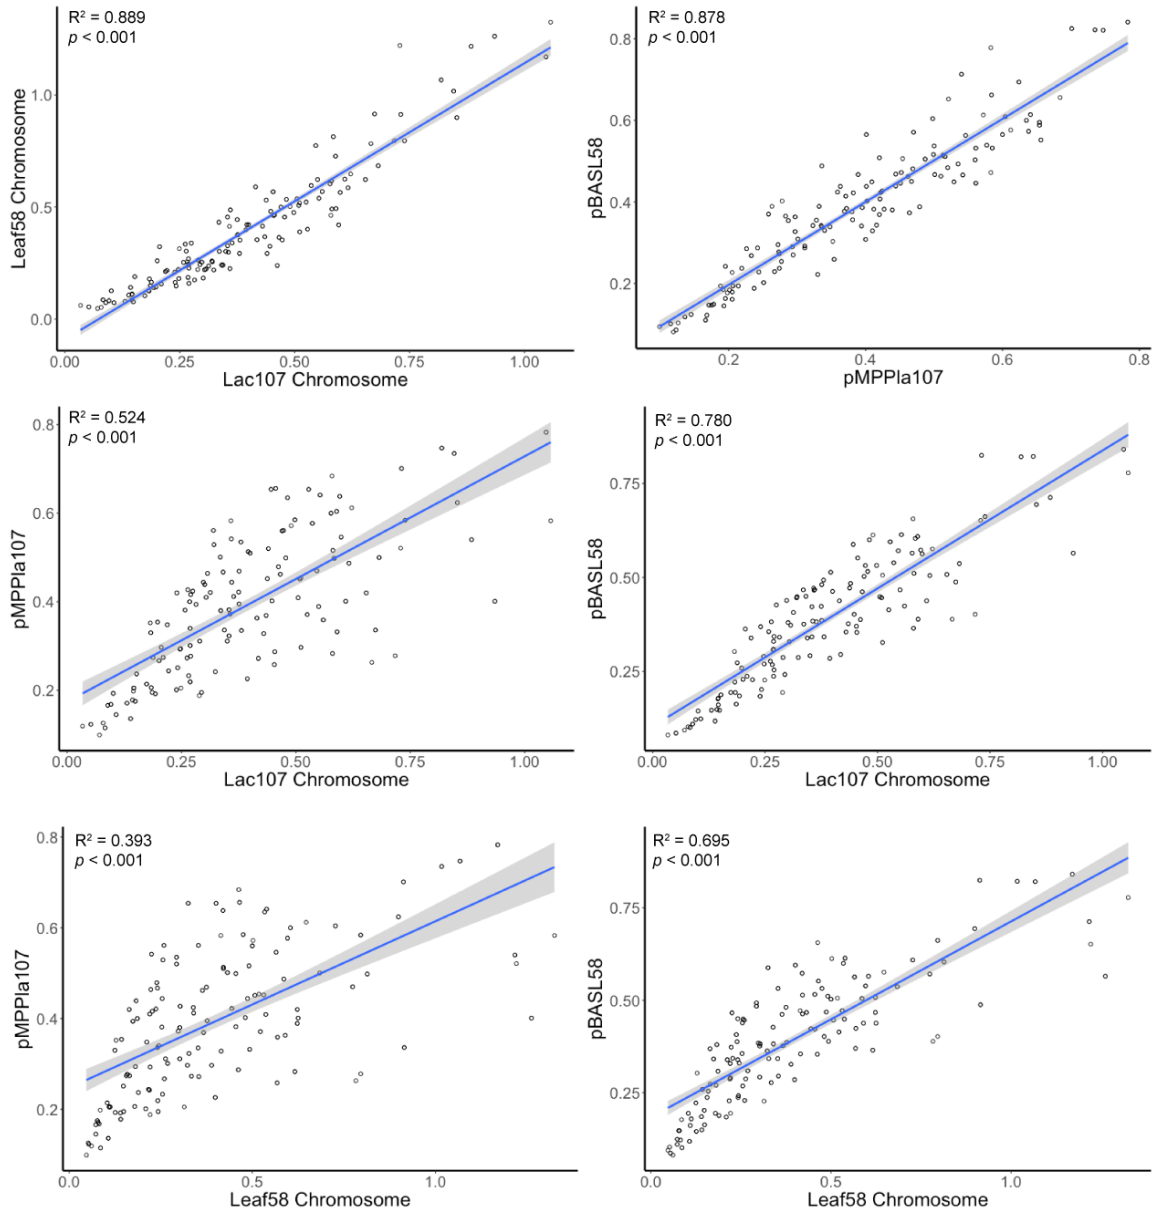

542

543 **Figure 4: Tetranucleotide frequencies between pMPPla107 and pBASL58**

544 **suggest an evolutionary relationship.** Nucleotide biases were determined to

545 demonstrate relatedness of megaplasmid and chromosomal sequences in a pairwise

546 fashion. The blue line represents the linear regression model with the surrounding

547 shaded grey area indicating a 95% confidence interval.  $R^2$  and  $p$  values are listed for

548 each comparison.

549

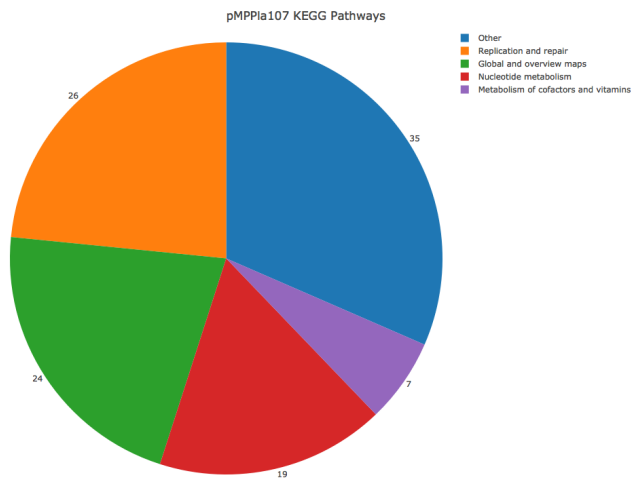

550

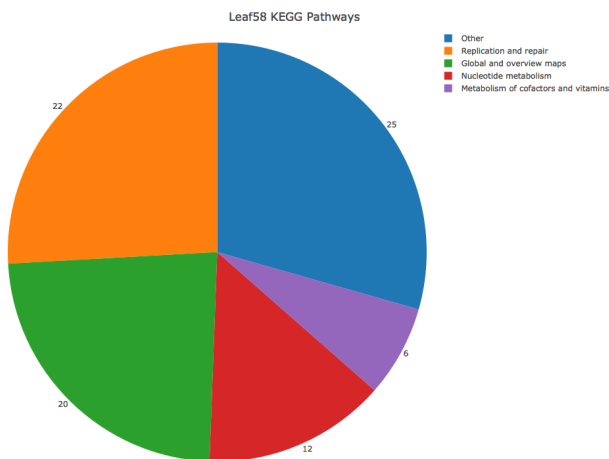

551

552 **Figure 5: pMPPla107 and pBASL58 share similar functional profiles.**

553 pMPPla107 and pBASL58 were input into UProC which counts the number of amino  
554 acid sequences that are predicted to belong to a KEGG pathway IDs. KEGG IDs were  
555 then matched with the correct pathway. All functional groups with < 5 counts were  
556 grouped into an “other” category.

557



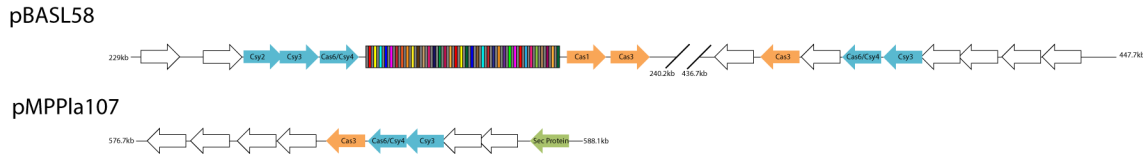

559

560 **Figure 6: CRISPR systems on pBASL58 and pMPPla107.** pBASL58 encodes two

561 CRISPR loci, one of which contains a repeat-spacer regions of 36 repeats.

562 pMPPla107 contains a CRISPR locus without any repeat-spacer regions. Direction of

563 arrows indicates gene orientation. Arrows are colored as: blue) *cys* genes, orange)

564 *cas* genes, green) secretion genes, and white) hypothetical genes. The multicolored

565 boxes indicate the repeat-spacer region, where grey boxes are spacers and colored

566 boxes are repeats.

567

568

569

| Name                   | Size    | Genes<br>(CDS) | tRNA | GC Content |
|------------------------|---------|----------------|------|------------|
| pMPPla107              | 971871  | 1082           | 54   | 52.84      |
| pBASL58                | 903765  | 996            | 44   | 55.4       |
| Leaf58<br>Concatenated | 5378738 | 4847           | 80   | 62.35      |
| Lac107<br>Concatenated | 5936302 | 5436           | 58   | 58.26      |

570

571 **Table 1: General features of *P. syringae* and *Pseudomonas* Leaf58 replicons**

572 **have similarities.** Size, coding regions, tRNAs, and GC content were calculated to

573 understand the relationship between the four sequences on a broad scale.

574 “Concatenated” indicates that all sequences from the assemblies except either the

575 pMPPla107 or pBASL58 replicons to their respective genome were concatenated

576 together.

577

578



579

580 **Supplemental Figures**

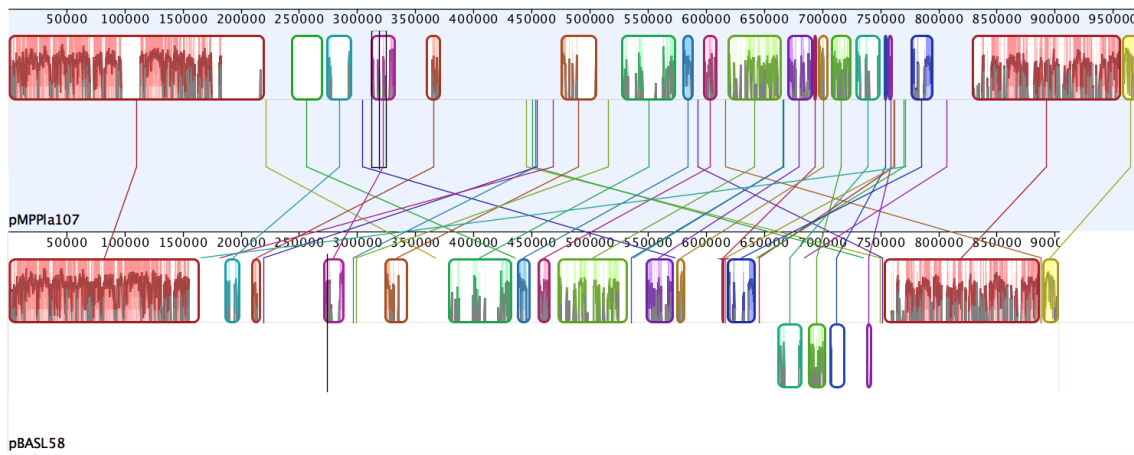

581

582 **Supplemental Figure 1:** MAUVE analysis of pMPPla107 and pBASL58 demonstrate  
583 local collinear blocks (LCBs) and areas of synteny. Lines connect LCBs with each  
584 other between megaplasmids. Blocks below the midline for each sequence indicate  
585 inverted regions. Colored areas within LCBs indicate higher levels of homology  
586 between sequences.

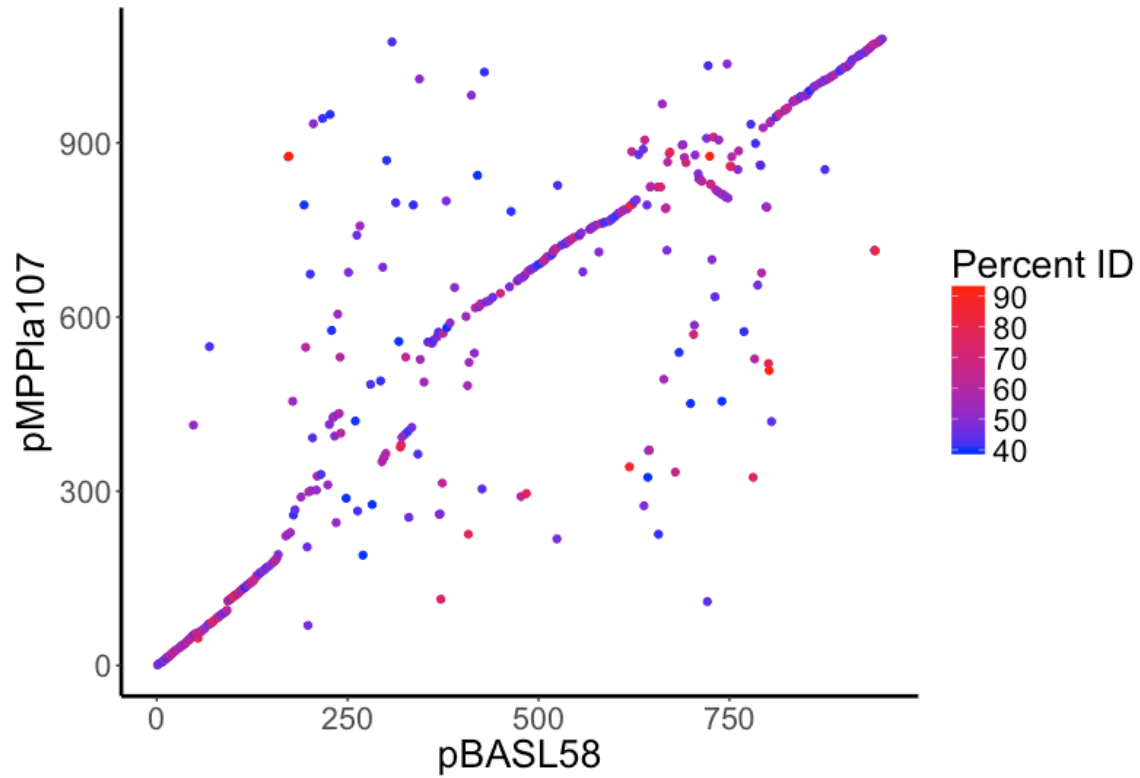

587

588 **Supplemental Figure 2:** BLASTp results of pMPPla107 and pBASL58 indicate  
589 syntenic and divergent sequences. Axes indicate gene position order. The color  
590 gradient is set to BLASTp percent identity results for each comparison. A percent  
591 identity cutoff of  $\geq 40\%$  was used.

592



602

603 **References**

- 604 1. Vos, M. & Eyre-Walker, A. Are pangenomes adaptive or not? *Nature*  
605 *Microbiology* **2**, 1576–1576 (2017).
- 606 2. McInerney, J. O., McNally, A. & O'Connell, M. J. Why prokaryotes have  
607 pangenomes. *Nature Microbiology* **2**, 17040 (2017).
- 608 3. Shapiro, B. J. The population genetics of pangenomes. *Nature Microbiology* **2**,  
609 1574–1574 (2017).
- 610 4. Cohen, O., Gophna, U. & Pupko, T. The complexity hypothesis revisited:  
611 connectivity rather than function constitutes a barrier to horizontal gene  
612 transfer. *Mol Biol Evol* **28**, 1481–1489 (2011).
- 613 5. Lercher, M. J. & Pál, C. Integration of horizontally transferred genes into  
614 regulatory interaction networks takes many million years. *Mol Biol Evol* **25**,  
615 559–567 (2008).
- 616 6. Wellner, A. & Gophna, U. Neutrality of foreign complex subunits in an  
617 experimental model of lateral gene transfer. *Mol Biol Evol* **25**, 1835–1840  
618 (2008).
- 619 7. Cooper, V. S., Vohr, S. H., Wrocklage, S. C. & Hatcher, P. J. Why genes evolve  
620 faster on secondary chromosomes in bacteria. *PLOS Comput Biol* **6**,  
621 e1000732 (2010).
- 622 8. Choudhary, M., Zanhua, X., Fu, Y. X. & Kaplan, S. Genome analyses of three  
623 strains of *Rhodobacter sphaeroides*: evidence of rapid evolution of  
624 chromosome II. *Journal of Bacteriology* **189**, 1914–1921 (2007).
- 625 9. Guo, H., Sun, S., Eardly, B., Finan, T. & Xu, J. Genome variation in the  
626 symbiotic nitrogen-fixing bacterium *Sinorhizobium meliloti*. *Genome* **52**,  
627 862–875 (2009).
- 628 10. Epstein, B. *et al.* Population genomics of the facultatively mutualistic  
629 bacteria *Sinorhizobium meliloti* and *S. medicae*. *PLoS Genet.* **8**, e1002868  
630 (2012).
- 631 11. Holden, M. T. G. *et al.* Genomic plasticity of the causative agent of  
632 melioidosis, *Burkholderia pseudomallei*. *PNAS* **101**, 14240–14245 (2004).
- 633 12. Holden, M. T. G. *et al.* The genome of *Burkholderia cenocepacia* J2315, an  
634 epidemic pathogen of cystic fibrosis patients. *Journal of Bacteriology* **191**,  
635 261–277 (2009).
- 636 13. Janssen, P. J. *et al.* The complete genome sequence of *Cupriavidus*  
637 *metallidurans* strain CH34, a master survivalist in harsh and anthropogenic  
638 environments. *PLoS ONE* **5**, e10433 (2010).
- 639 14. diCenzo, G. C. & Finan, T. M. The Divided Bacterial Genome: Structure,  
640 Function, and Evolution. *Microbiol. Mol. Biol. Rev.* **81**, e00019–17 (2017).
- 641 15. Baltrus, D. A. Exploring the costs of horizontal gene transfer. *Trends in*  
642 *Ecology & Evolution* **28**, 489–495 (2013).
- 643 16. San Millan, A. & MacLean, R. C. Fitness Costs of Plasmids: a Limit to Plasmid  
644 Transmission. *Microbiol Spectr* **5**, (2017).
- 645 17. Jain, R., Rivera, M. C. & Lake, J. A. Horizontal gene transfer among genomes:

- 646 the complexity hypothesis. *PNAS* **96**, 3801–3806 (1999).
- 647 18. MacLean, R. C. & San Millan, A. Microbial Evolution: Towards Resolving the  
648 Plasmid Paradox. *Curr. Biol.* **25**, R764–7 (2015).
- 649 19. Kacar, B., Garmendia, E., Tuncbag, N., Andersson, D. I. & Hughes, D.  
650 Functional Constraints on Replacing an Essential Gene with Its Ancient and  
651 Modern Homologs. *MBio* **8**, e01276–17 (2017).
- 652 20. Harrison, E., Guymier, D., Spiers, A. J., Paterson, S. & Brockhurst, M. A. Parallel  
653 compensatory evolution stabilizes plasmids across the parasitism-  
654 mutualism continuum. *Curr. Biol.* **25**, 2034–2039 (2015).
- 655 21. Tett, A. *et al.* Sequence-based analysis of pQBR103; a representative of a  
656 unique, transfer-proficient mega plasmid resident in the microbial  
657 community of sugar beet. *ISME J* **1**, 331–340 (2007).
- 658 22. Hall, J. P. J. *et al.* Environmentally co-occurring mercury resistance plasmids  
659 are genetically and phenotypically diverse and confer variable context-  
660 dependent fitness effects. *Environ. Microbiol.* **17**, 5008–5022 (2015).
- 661 23. Baltrus, D. A. *et al.* Dynamic Evolution of Pathogenicity Revealed by  
662 Sequencing and Comparative Genomics of 19 *Pseudomonas syringae* Isolates.  
663 *PLoS Pathog* **7**, e1002132 (2011).
- 664 24. Andreani, N. A., Hesse, E. & Vos, M. Prokaryote genome fluidity is dependent  
665 on effective population size. *ISME J* **11**, 1719–1721 (2017).
- 666 25. Romanchuk, A. *et al.* Bigger is not always better: transmission and fitness  
667 burden of ~1MB *Pseudomonas syringae* megaplasmid pMPPla107. *Plasmid*  
668 **73**, 16–25 (2014).
- 669 26. Dougherty, K. *et al.* Multiple phenotypic changes associated with large-scale  
670 horizontal gene transfer. *PLoS ONE* **9**, e102170 (2014).
- 671 27. Bai, Y. *et al.* Functional overlap of the Arabidopsis leaf and root microbiota.  
672 *Nature* **528**, 364–369 (2015).
- 673 28. Wick, R. R., Judd, L. M., Gorrie, C. L. & Holt, K. E. Unicycler: Resolving  
674 bacterial genome assemblies from short and long sequencing reads. *PLoS*  
675 *Comput Biol* **13**, e1005595 (2017).
- 676 29. Wood, D. E. & Salzberg, S. L. Kraken: ultrafast metagenomic sequence  
677 classification using exact alignments. *Genome Biol.* **15**, R46 (2014).
- 678 30. Tatusova, T., DiCuccio, M., acids, A. B. N.2016. NCBI prokaryotic genome  
679 annotation pipeline. *academic.oup.com*
- 680
- 681 31. Charif, D. & Lobry, J. R. in *Structural Approaches to Sequence Evolution* 207–  
682 232 (Springer, Berlin, Heidelberg, 2007). doi:10.1007/978-3-540-35306-  
683 5\_10
- 684 32. Abby, S. S., Néron, B., Ménager, H., Touchon, M. & Rocha, E. P. C.  
685 MacSyFinder: a program to mine genomes for molecular systems with an  
686 application to CRISPR-Cas systems. *PLoS ONE* **9**, e110726 (2014).
- 687 33. Grissa, I., Vergnaud, G. & Pourcel, C. CRISPRFinder: a web tool to identify  
688 clustered regularly interspaced short palindromic repeats. *Nucleic Acids Res.*  
689 **35**, W52–7 (2007).
- 690 34. Couvin, D. *et al.* CRISPRCasFinder, an update of CRISPRFinder, includes a  
691 portable version, enhanced performance and integrates search for Cas

- 692 proteins. *Nucleic Acids Res.* **99**, 7536 (2018).
- 693 35. Altschul, S. F., Gish, W., Miller, W., Myers, E. W. & Lipman, D. J. Basic local  
694 alignment search tool. *Journal of Molecular Biology* **215**, 403–410 (1990).
- 695 36. Darling, A. E., Mau, B. & Perna, N. T. progressiveMauve: multiple genome  
696 alignment with gene gain, loss and rearrangement. *PLoS ONE* **5**, e11147  
697 (2010).
- 698 37. Albertsen, M. *et al.* Genome sequences of rare, uncultured bacteria obtained  
699 by differential coverage binning of multiple metagenomes. *Nature*  
700 *Biotechnology* **31**, 533–538 (2013).
- 701 38. Kanehisa, M. & Goto, S. KEGG: kyoto encyclopedia of genes and genomes.  
702 *Nucleic Acids Res.* **28**, 27–30 (2000).
- 703 39. Meinicke, P. UProC: tools for ultra-fast protein domain classification.  
704 *Bioinformatics* **31**, 1382–1388 (2015).
- 705 40. Moriya, Y., Itoh, M., Okuda, S., Yoshizawa, A. C. & Kanehisa, M. KAAS: an  
706 automatic genome annotation and pathway reconstruction server. *Nucleic*  
707 *Acids Res.* **35**, W182–5 (2007).
- 708 41. Hesse, C. *et al.* Genome-based evolutionary history of *Pseudomonas* spp.  
709 *Environ. Microbiol.* **7**, e1002132 (2018).
- 710 42. Richter, M. & Rosselló-Móra, R. Shifting the genomic gold standard for the  
711 prokaryotic species definition. *Proc. Natl. Acad. Sci. U.S.A.* **106**, 19126–19131  
712 (2009).
- 713 43. Nishida, H., Abe, R., Nagayama, T. & Yano, K. Genome Signature Difference  
714 between *Deinococcus radiodurans* and *Thermus thermophilus*. *Int J Evol Biol*  
715 **2012**, 205274–6 (2012).
- 716 44. Teeling, H., Meyerdierks, A., Bauer, M., Amann, R. & Glöckner, F. O.  
717 Application of tetranucleotide frequencies for the assignment of genomic  
718 fragments. *Environ. Microbiol.* **6**, 938–947 (2004).
- 719 45. Tomoyasu, T. *et al.* Escherichia coli FtsH is a membrane-bound, ATP-  
720 dependent protease which degrades the heat-shock transcription factor  
721 sigma 32. *EMBO J.* **14**, 2551–2560 (1995).
- 722 46. Ito, K. & Akiyama, Y. Cellular functions, Mechanism of action, and regulation  
723 of *ftsH* protease. *Ann. Rev. Microbiol.* **59**, 211–231 (2005).
- 724 47. Hall, J. P. J., Brockhurst, M. A. & Harrison, E. Sampling the mobile gene pool:  
725 innovation via horizontal gene transfer in bacteria. *Philos. Trans. R. Soc.*  
726 *Lond., B, Biol. Sci.* **372**, 20160424 (2017).
- 727 48. Bragg, J. G. & Wagner, A. Protein material costs: single atoms can make an  
728 evolutionary difference. *Trends Genet.* **25**, 5–8 (2009).
- 729 49. Shachrai, I., Zaslaver, A., Alon, U. & Dekel, E. Cost of unneeded proteins in *E.*  
730 *coli* is reduced after several generations in exponential growth. *Molecular*  
731 *Cell* **38**, 758–767 (2010).
- 732 50. Dittmar, K. A., Sørensen, M. A., Elf, J., Ehrenberg, M. & Pan, T. Selective  
733 charging of tRNA isoacceptors induced by amino-acid starvation. *EMBO Rep.*  
734 **6**, 151–157 (2005).
- 735 51. Elf, J., Nilsson, D., Tenson, T. & Ehrenberg, M. Selective charging of tRNA  
736 isoacceptors explains patterns of codon usage. *Science* **300**, 1718–1722  
737 (2003).

- 738 52. Bonomo, J. & Gill, R. T. Amino acid content of recombinant proteins  
739 influences the metabolic burden response. *Biotechnol. Bioeng.* **90**, 116–126  
740 (2005).
- 741 53. Hamperl, S. & Cimprich, K. A. Conflict Resolution in the Genome: How  
742 Transcription and Replication Make It Work. *Cell* **167**, 1455–1467 (2016).
- 743 54. McGlynn, P., Savery, N. J. & Dillingham, M. S. The conflict between DNA  
744 replication and transcription. *Mol. Microbiol.* **85**, 12–20 (2012).
- 745 55. Dillion, M. M., Thakur, S., Almeida, R. N. & Guttman, D. S. Recombination of  
746 ecologically and evolutionarily significant loci maintains genetic cohesion in  
747 the *Pseudomonas syringae* species complex. *bioRxiv* 227413 (2017).  
748 doi:10.1101/227413
- 749 56. Nowell, R. W., Green, S., Laue, B. E. & Sharp, P. M. The extent of genome flux  
750 and its role in the differentiation of bacterial lineages. *Genome Biol Evol* **6**,  
751 1514–1529 (2014).
- 752 57. Doudna, J. A. & Charpentier, E. Genome editing. The new frontier of genome  
753 engineering with CRISPR-Cas9. *Science* **346**, 1258096–1258096 (2014).
- 754 58. Hsu, P. D., Lander, E. S. & Zhang, F. Development and applications of CRISPR-  
755 Cas9 for genome engineering. *Cell* **157**, 1262–1278 (2014).
- 756 59. Marraffini, L. A. & Sontheimer, E. J. CRISPR interference: RNA-directed  
757 adaptive immunity in bacteria and archaea. *Nat. Rev. Genet.* **11**, 181–190  
758 (2010).
- 759 60. Deveau, H., Garneau, J. E. & Moineau, S. CRISPR/Cas system and its role in  
760 phage-bacteria interactions. *Annual Review of Microbiology* **64**, 475–493  
761 (2010).
- 762 61. Makarova, K. S. *et al.* An updated evolutionary classification of CRISPR-Cas  
763 systems. *Nat Rev Micro* **13**, 722–736 (2015).
- 764 62. Lillestøl, R. K. *et al.* CRISPR families of the crenarchaeal genus *Sulfolobus*:  
765 bidirectional transcription and dynamic properties. *Mol. Microbiol.* **72**, 259–  
766 272 (2009).
- 767 63. Godde, J. S. & Bickerton, A. The repetitive DNA elements called CRISPRs and  
768 their associated genes: evidence of horizontal transfer among prokaryotes. *J.*  
769 *Mol. Evol.* **62**, 718–729 (2006).
- 770 64. Guan, J., Wang, W., Sun, B. & Fey, P. D. Chromosomal Targeting by the Type  
771 III-A CRISPR-Cas System Can Reshape Genomes in *Staphylococcus aureus*.  
772 *mSphere* **2**, e00403–17 (2017).
- 773 65. Vercoe, R. B. *et al.* Cytotoxic chromosomal targeting by CRISPR/Cas systems  
774 can reshape bacterial genomes and expel or remodel pathogenicity islands.  
775 *PLoS Genet.* **9**, e1003454 (2013).
- 776 66. Briner, A. E. *et al.* Occurrence and Diversity of CRISPR-Cas Systems in the  
777 Genus *Bifidobacterium*. *PLoS ONE* **10**, e0133661 (2015).
- 778 67. Stern, A., Keren, L., Wurtzel, O., Amitai, G. & Sorek, R. Self-targeting by  
779 CRISPR: gene regulation or autoimmunity? *Trends Genet.* **26**, 335–340  
780 (2010).
- 781
